# Supplementary material for: Mouse spermatozoa with higher fertilization rates have thinner nuclei
Source: PubMed Central journal article supplement (PMC5641427; doi:10.7717/peerj.3913), 2017-10-12

# S1 Figure

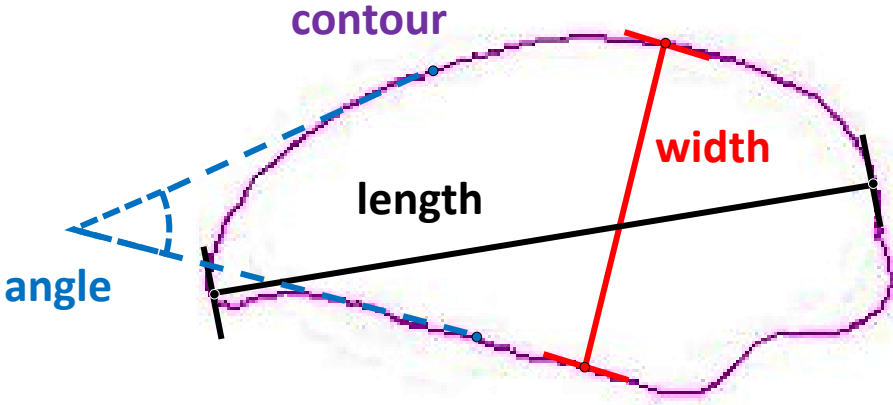

# S2 Figure

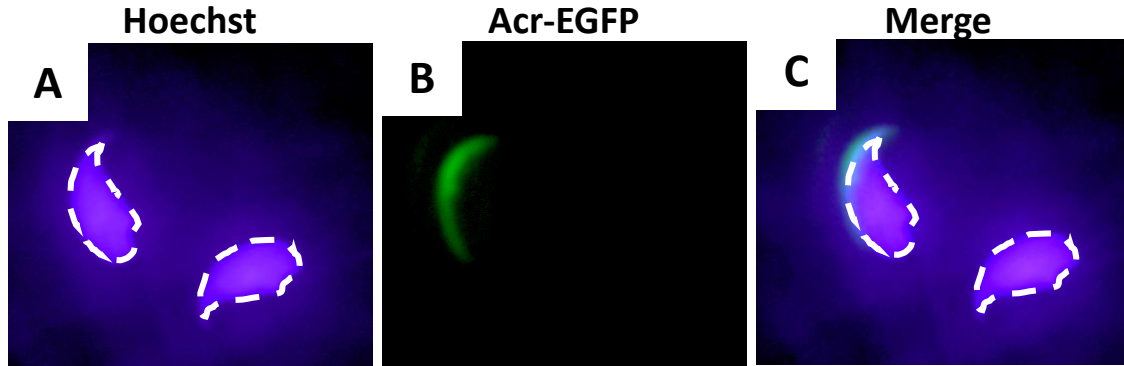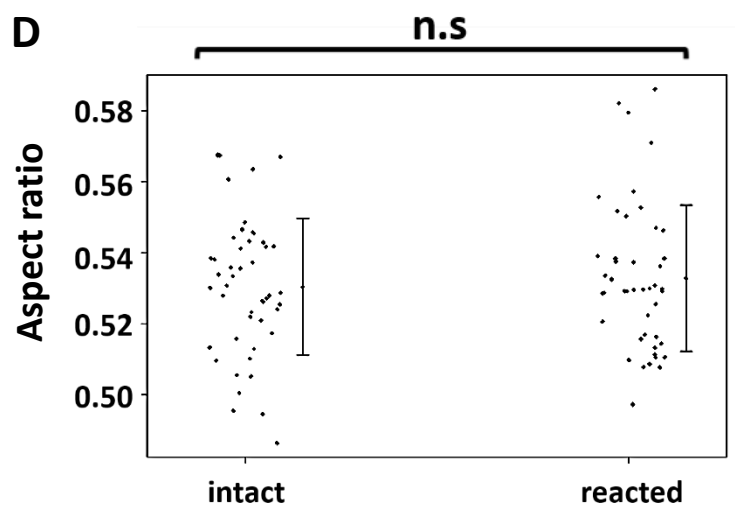

# S3 Figure

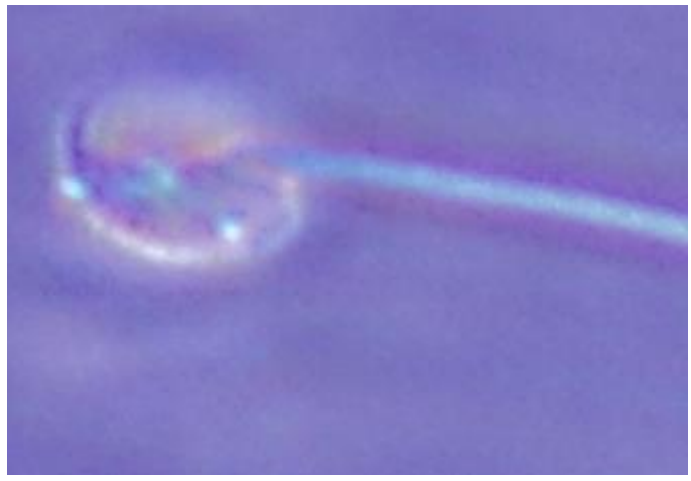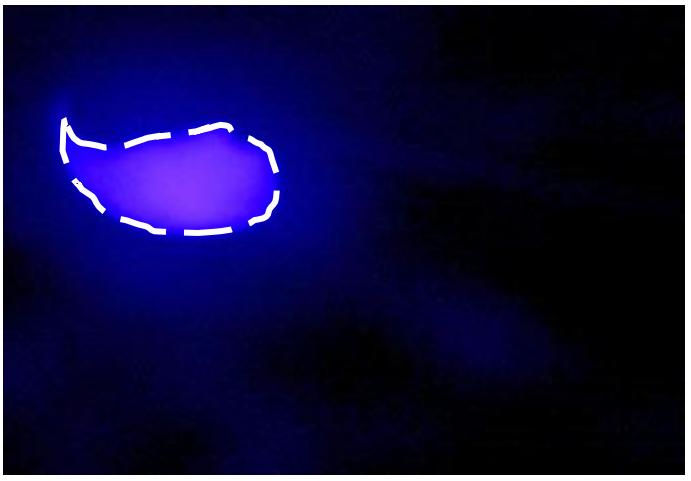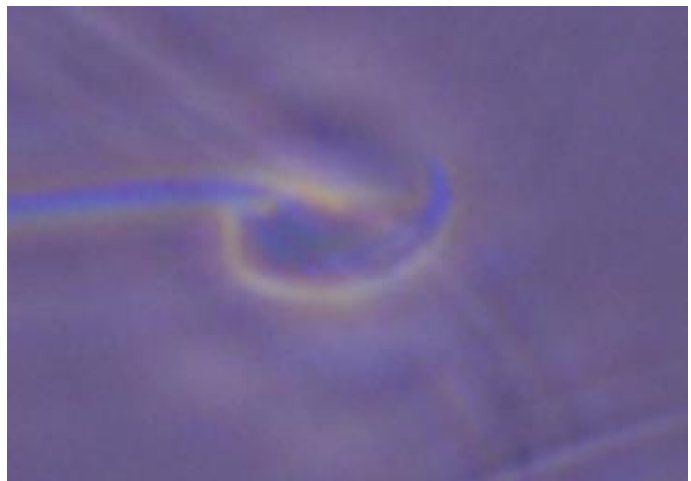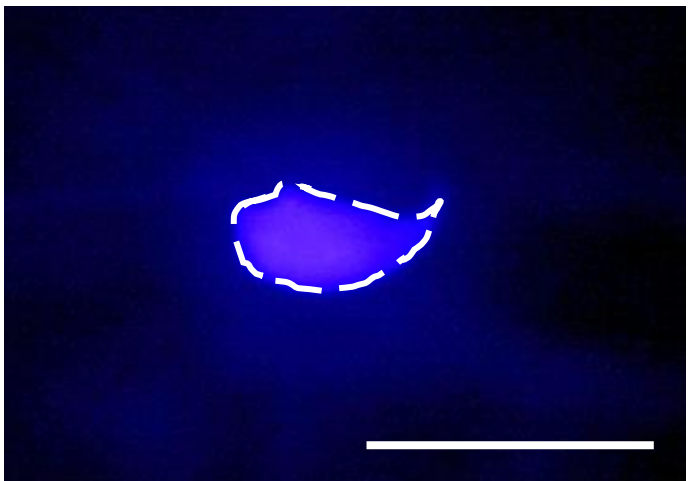

Bar: 10 $\mu$ m

# S4 Figure

## A

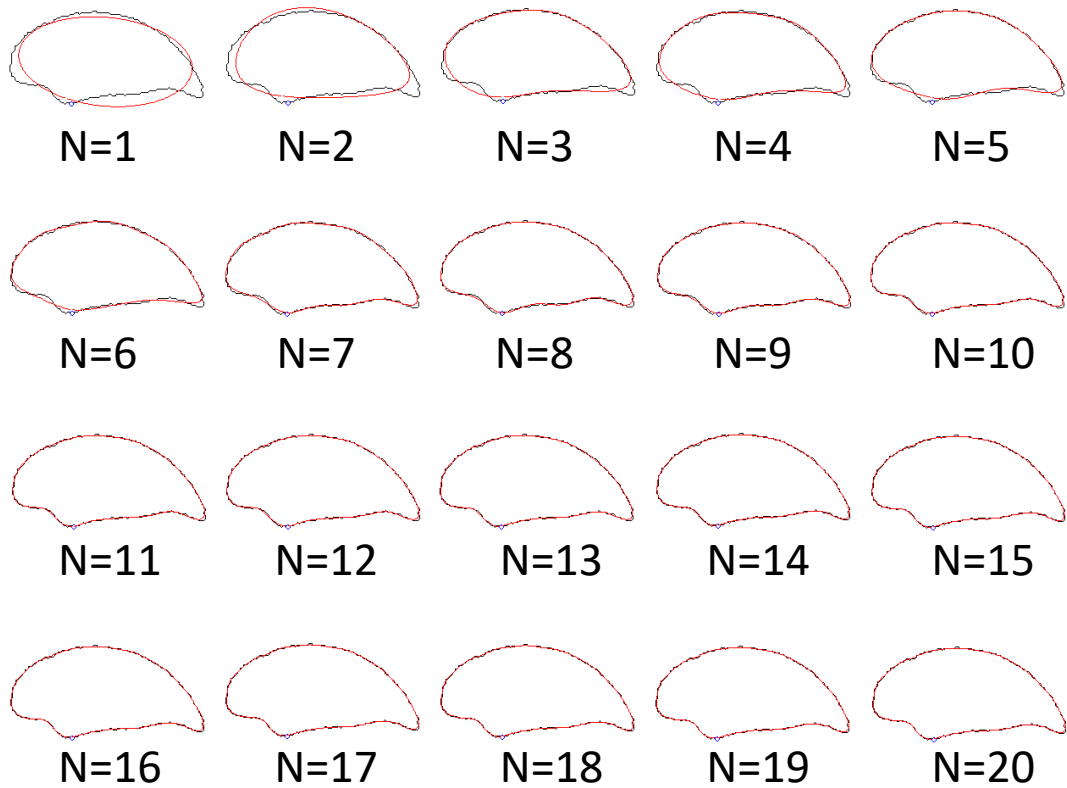

## B

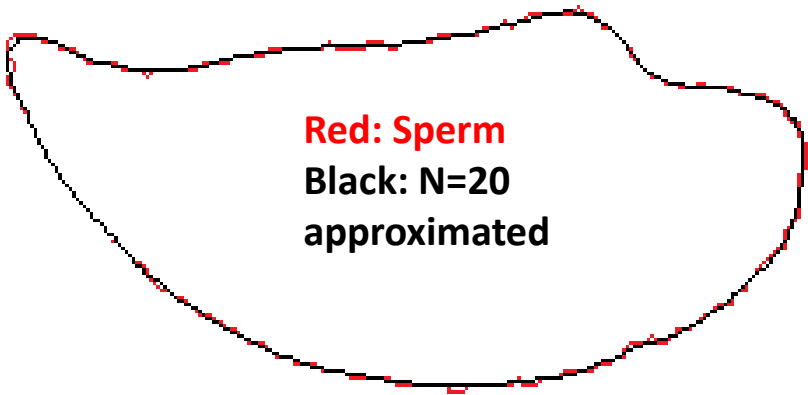

# S5 Figure

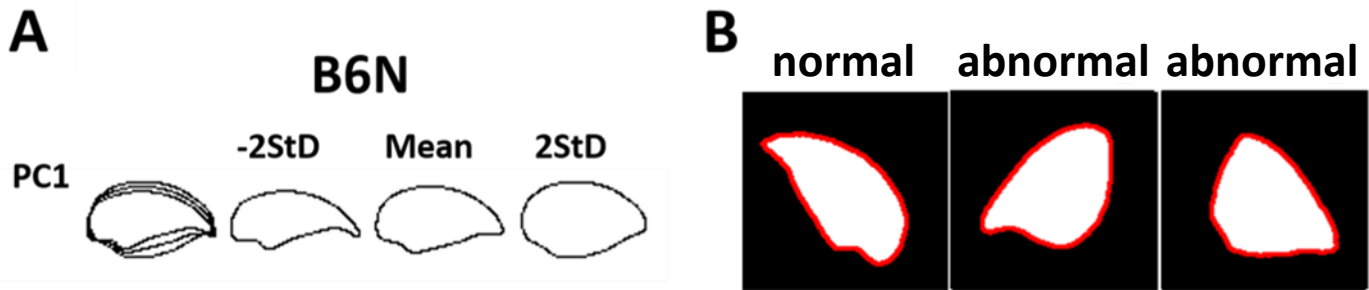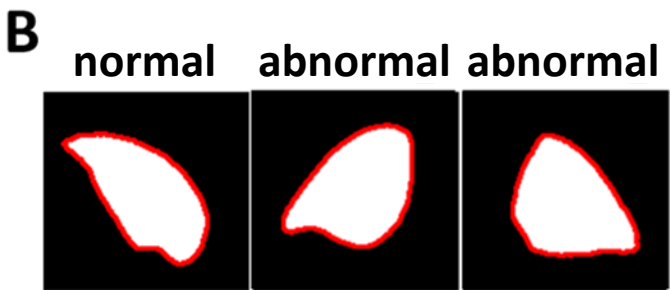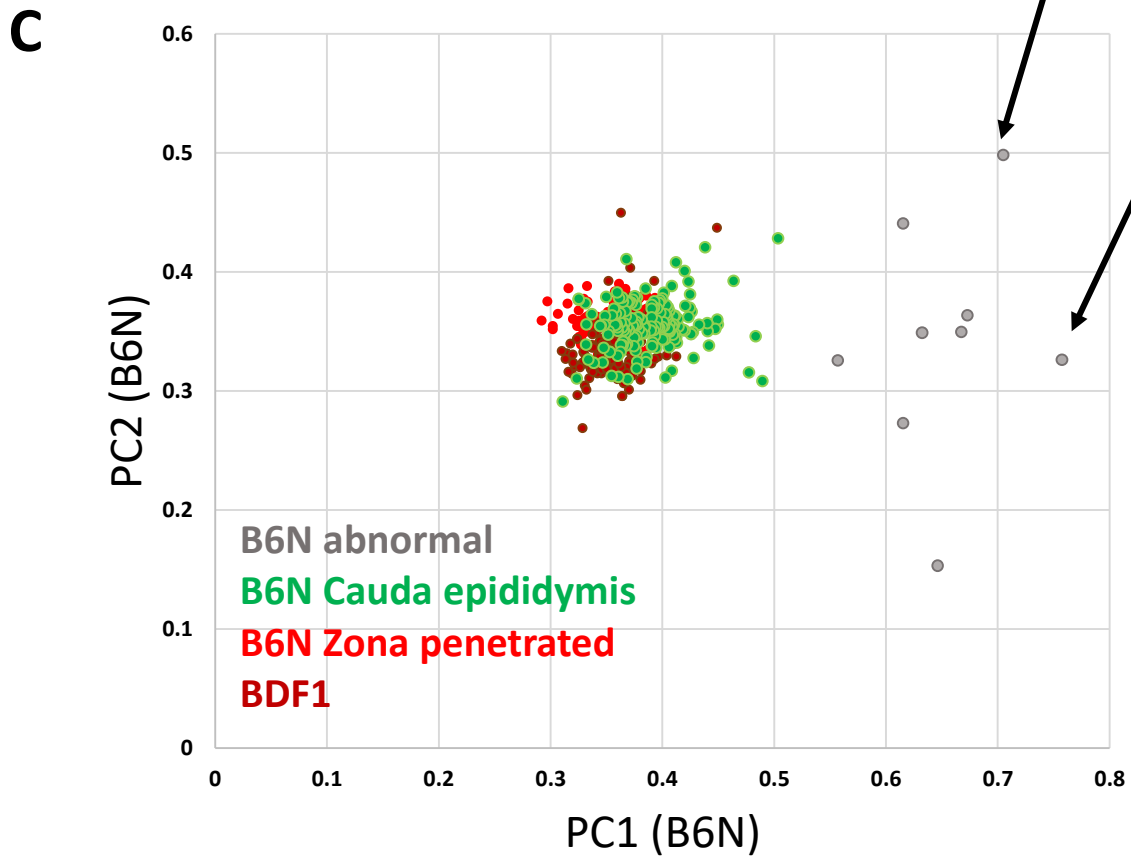

# S6 Figure

## BDF1

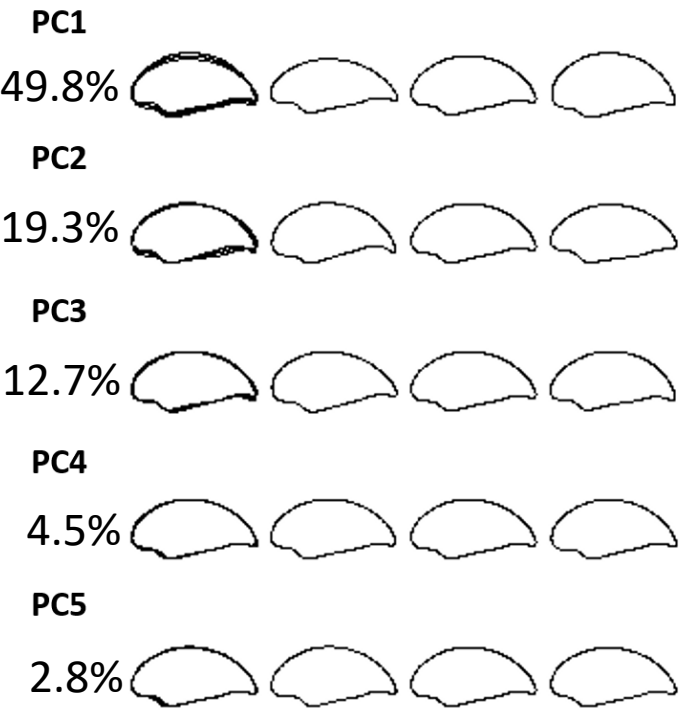

## B6N

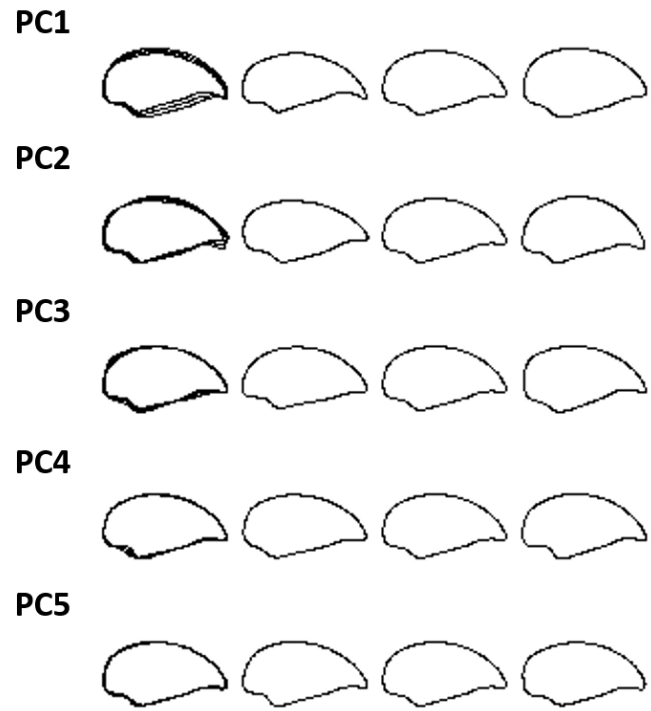

S7 Figure

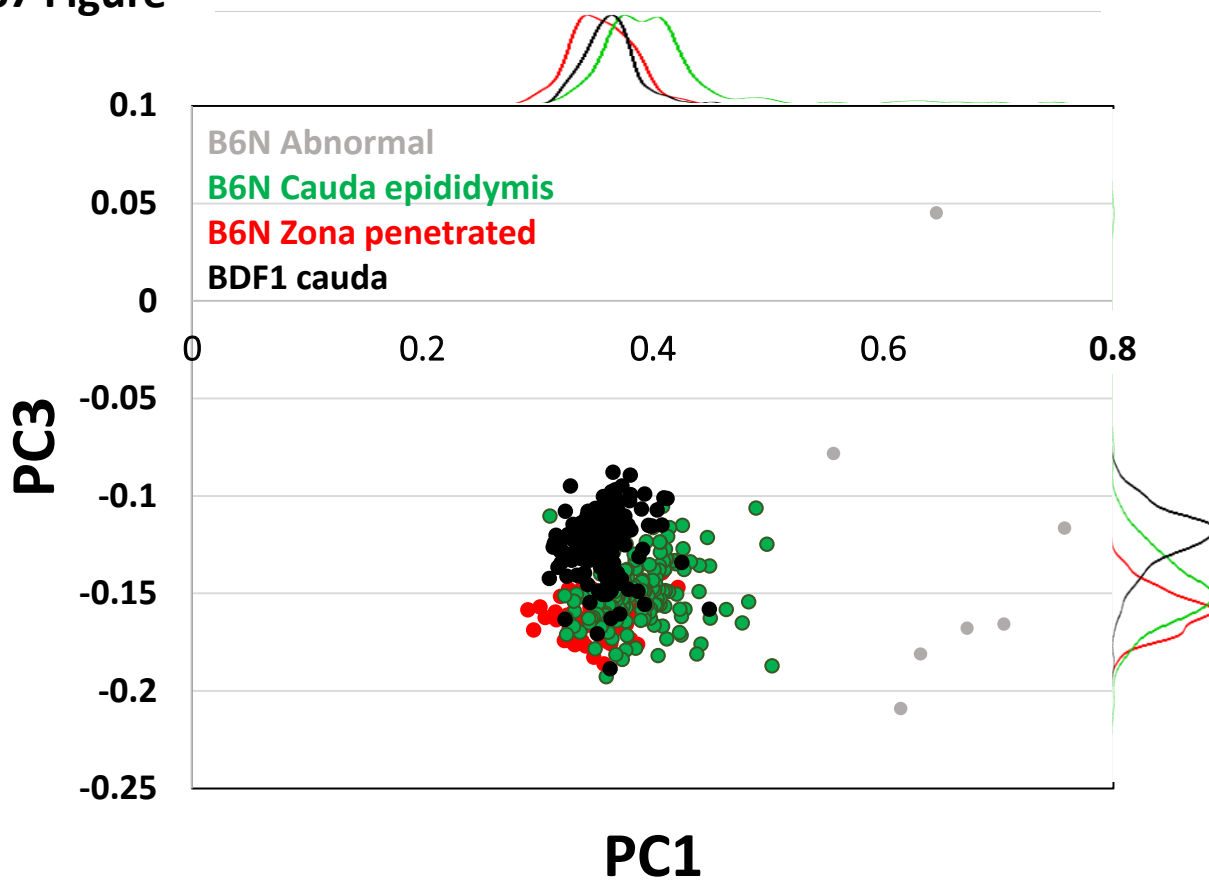

S8 Figure

A

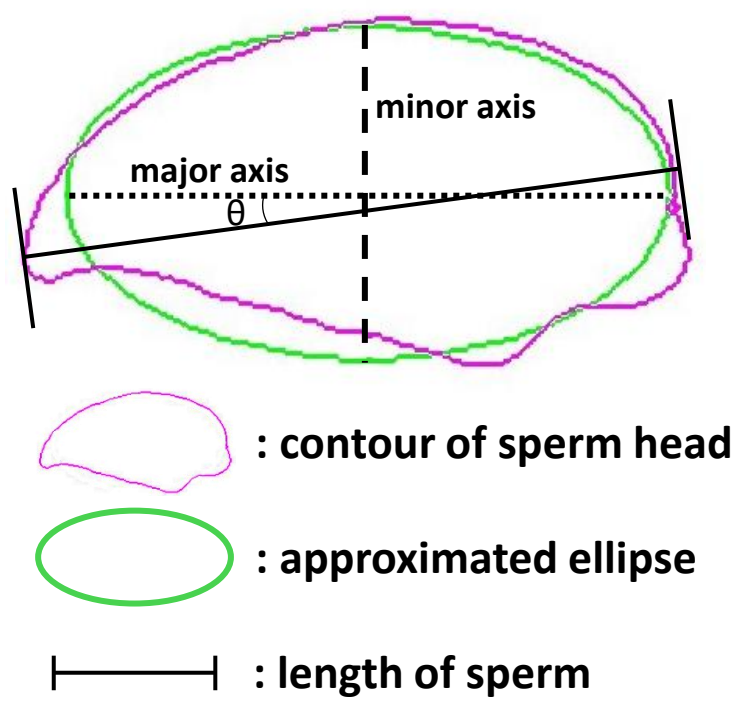

B

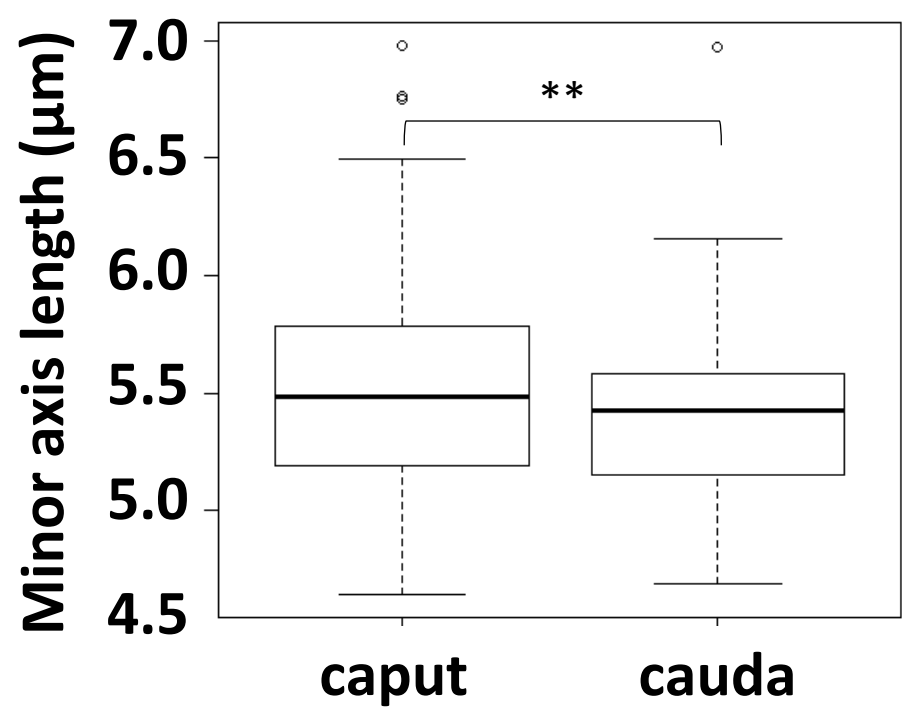



# S9 Figure

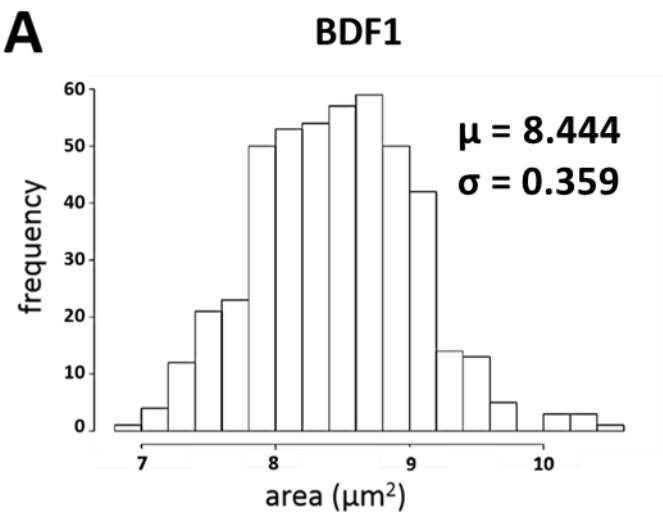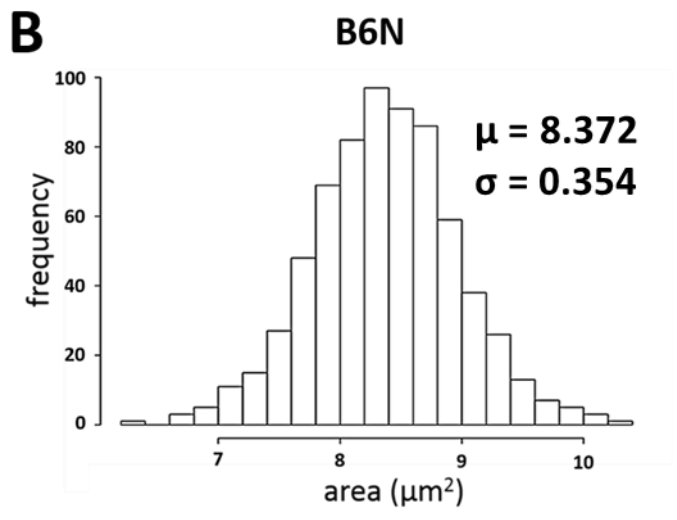

S10 Figure

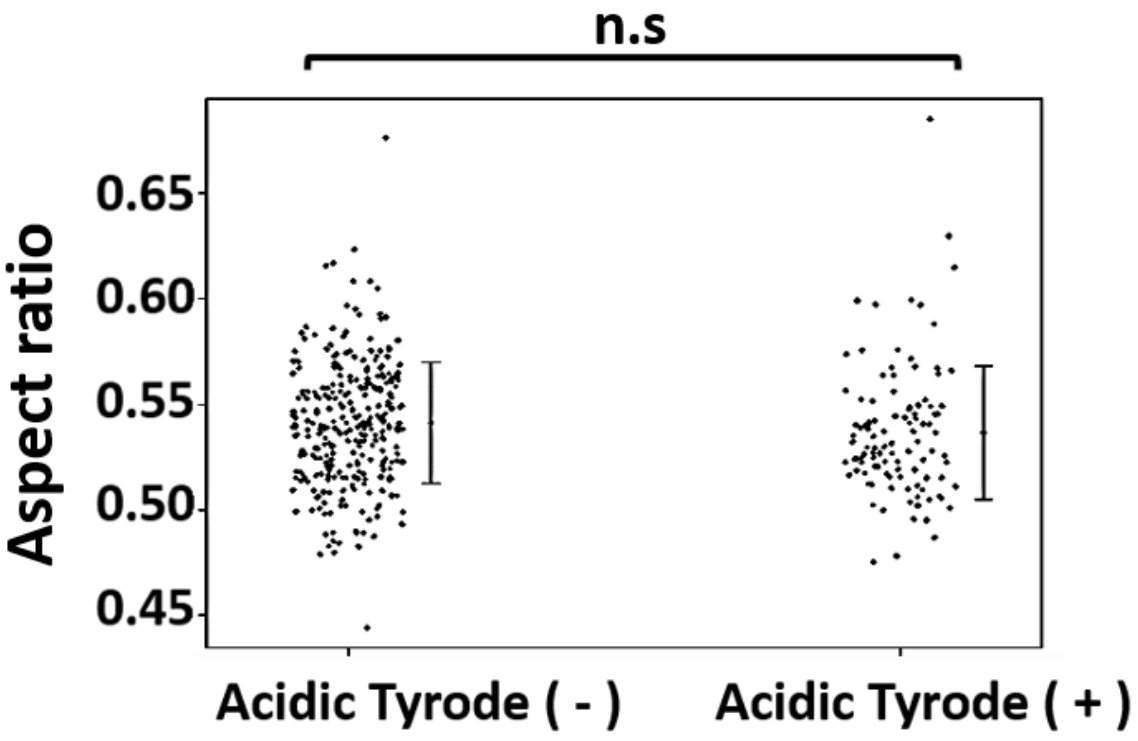

Supplement: peerj-05-3913-s001.pdf [file peerj-05-3913-s001.pdf]
